# Supplementary material
Source: PubMed Central journal article supplement (PMC10587820)
Supplement: jama-e2319521-s001.pdf [file jama-e2319521-s001.pdf]

## **Data Sharing Statement**

### **Data**

**Data available:** No

### **Additional Information**

**Explanation for why data not available:** Data belongs to AAMC
